# Supplementary material for: A triazine-based porous organic polymer: a novel heterogeneous basic organocatalyst for facile one-pot synthesis of 2-amino-4H-chromenes
Source: Royal Society of Chemistry journal article supplement (doi:10.1039/c5ra00951k), 2015-01-01
Supplement: c5ra00951k1.pdf [file c5ra00951k1.pdf]

## Supporting Information

### Triazine-based porous organic polymer: a novel heterogeneous basic organocatalyst for facile one-pot synthesis of 2-amino-4*H*-chromenes

Sudipta K. Kundu and Asim Bhaumik\*

#### **<sup>1</sup>H and <sup>13</sup>C NMR chemical shifts for different 2-amino-chromene products:**

**2-amino-3-cyano-7-hydroxy-4-phenyl-4*H*-chromene (Table 1, Entry 1), <sup>1</sup>H NMR (500 MHz, DMSO-*d*<sub>6</sub>)** δ 9.691 (s, 1H), 7.288-7.318 (t, 2H), 7.156-7.216 (m, 3H), 6.848 (s, 2H), 6.793-6.809 (d, 1H, *J* = 8 Hz), 6.470-6.491 (m, 1H), 6.405-6.409 (d, 1H, *J* = 2 Hz), 4.614 (s, 1H); **<sup>13</sup>C NMR (500 MHz, DMSO-*d*<sub>6</sub>)** δ 56.31, 102.15, 112.33, 113.72, 120.56, 126.57, 127.31, 128.52, 129.84, 146.29, 148.83, 157.02, 160.21.

**2-amino-3-cyano-7-hydroxy-4-(4-methylphenyl)-4*H*-chromene (Table 1, Entry 2), <sup>1</sup>H NMR (500 MHz, DMSO-*d*<sub>6</sub>)** δ 9.636 (s, 1H), 7.014-7.090 (m, 3H), 6.744-6.789 (m, 2H), 6.370-6.459 (m, 2H), 5.735 (s, 2H), 4.543 (s, 1H), 2.067 (s, 3H); **<sup>13</sup>C NMR (500 MHz, DMSO-*d*<sub>6</sub>)** δ 20.52, 56.43, 102.09, 112.27, 113.86, 120.63, 127.24, 129.06, 129.83, 130.16, 135.68, 143.36, 148.80, 156.95, 160.10.

**2-amino-3-cyano-7-hydroxy-4-(4-fluorophenyl)-4*H*-chromene (Table 1, Entry 3), <sup>1</sup>H NMR (500 MHz, DMSO-*d*<sub>6</sub>)** δ 9.700 (s, 1H), 7.181-7.209 (m, 2H), 7.107-7.142 (m, 2H), 6.867 (s, 2H), 6.776-6.793 (d, 1H, *J* = 8.5 Hz), 6.476-6.497 (m, 1H), 6.402-6.406 (d, 1H, *J* = 2 Hz), 4.657 (s, 1H); **<sup>13</sup>C NMR (500 MHz, DMSO-*d*<sub>6</sub>)** δ 56.21, 102.16, 112.40, 113.50, 115.15, 115.32, 120.46, 129.16, 129.22, 129.82, 142.50, 148.77, 157.10, 160.15.

**2-amino-3-cyano-7-hydroxy-4-(4-chlorophenyl)-4H-chromene (Table 1, Entry 4), <sup>1</sup>H NMR (500 MHz, DMSO-d<sub>6</sub>)** δ 9.712 (s, 1H), 7.357-7.373 (d, 2H, *J* = 8 Hz), 7.179-7.196 (d, 2H, *J* = 8.5 Hz), 6.895 (s, 2H), 6.775-6.792 (d, 1H, *J* = 8.5 Hz), 6.478-6.499 (m, 1H), 6.404-6.408 (d, 1H, *J* = 2 Hz), 4.663 (s, 1H); **<sup>13</sup>C NMR (400 MHz, DMSO-d<sub>6</sub>)** δ 55.90, 102.21, 112.46, 113.19, 120.43, 128.53, 129.25, 129.85, 131.21, 145.29, 148.82, 157.20, 160.23.

**2-amino-3-cyano-7-hydroxy-4-(4-bromophenyl)-4H-chromene (Table 1, Entry 5), <sup>1</sup>H NMR (500 MHz, DMSO-d<sub>6</sub>)** δ 9.717 (s, 1H), 7.491-7.507 (d, 2H, *J* = 8 Hz), 7.120-7.137 (d, 2H, *J* = 8.5 Hz), 6.902 (s, 2H), 6.773-6.789 (d, 1H, *J* = 8 Hz), 6.480-6.497 (d, 1H, *J* = 8.5 Hz), 6.406 (s, 1H), 4.648 (s, 1H); **<sup>13</sup>C NMR (400 MHz, DMSO-d<sub>6</sub>)** δ 55.80, 102.19, 112.43, 113.08, 119.68, 120.45, 129.61, 129.83, 131.42, 145.67, 148.77, 157.17, 160.20.

**2-amino-3-cyano-7-hydroxy-4-(4-nitrophenyl)-4H-chromene (Table 1, Entry 6), <sup>1</sup>H NMR (500 MHz, DMSO-d<sub>6</sub>)** δ 9.80 (b, 1H), 8.29-8.31 (m, 2H), 7.44-7.46 (d, 2H), 7.02 (s, 2H), 6.79-6.81 (d, 1H), 6.44-6.53 (m, 2H), 4.86 (s, 1H); **<sup>13</sup>C NMR (500 MHz, DMSO-d<sub>6</sub>)** δ 55.34, 79.62, 102.89, 112.82, 113.11, 118.66, 120.74, 124.44, 129.17, 130.39, 146.80, 154.20, 157.99, 160.90.

**2-amino-7-hydroxy-4-(thiophen-2-yl)-4H-chromene-3-carbonitrile (Table 1, Entry 7), NMR (400 MHz, DMSO-d<sub>6</sub>)** δ 9.724 (s, 1H), 7.328-7.343 (m, 1H), 6.899-6.971 (m, 5H), 6.508-6.535 (m, 1H), 6.377-6.383 (d, 1H), 4.969 (s, 1H); **<sup>13</sup>C NMR (400 MHz, DMSO-d<sub>6</sub>)** δ 35.82, 57.05, 102.74, 112.94, 114.09, 120.99, 124.55, 125.56, 127.26, 130.39, 149.11, 152.01, 157.88, 160.87.

**3-Amino-2-cyano-1-phenyl-4H-benzo[f]-chromene (Table 1, Entry 8), <sup>1</sup>H NMR (400 MHz, DMSO-d<sub>6</sub>)** δ 7.890-7.939 (m, 2H), 7.816-7.838 (m, 1H), 7.398-7.433 (m, 2H), 7.320-7.342 (d, 1H, *J* = 8.8 Hz), 7.228-7.265 (t, 2H), 7.119-7.183 (m, 3H), 6.949 (s, 2H), 5.283 (s, 1H); **<sup>13</sup>C NMR (400 MHz, DMSO-d<sub>6</sub>)** δ 38.06, 57.91, 115.63, 116.74, 120.40, 123.57, 124.87, 126.54, 126.93, 127.02, 128.41, 128.64, 129.44, 130.13, 130.79, 145.65, 146.79, 159.65.

**3-Amino-2-cyano-1-(4-methylphenyl)-4H-benzo[f]-chromene**(Table 1, Entry 9),  $^1\text{H}$  NMR (400 MHz, DMSO- $d_6$ )  $\delta$  7.889-7.941 (m, 2H), 7.768-7.790 (m, 1H), 7.391-7.456 (m, 2H), 7.299-7.334 (m, 3H), 7.183-7.210 (m, 2H), 6.998 (s, 2H), 5.340 (s, 1H), 2.300 (s, 3H);  $^{13}\text{C}$  NMR (400 MHz, DMSO- $d_6$ )  $\delta$  22.10, 37.29, 57.40, 115.10, 116.76, 120.28, 123.48, 124.93, 127.10, 128.82, 129.64, 130.0, 130.80, 131.10, 132.08, 144.60, 146.76, 159.66.

**3-Amino-2-cyano-1-(4-chlorophenyl)-4H-benzo[f]-chromene**(Table 1, Entry 10),  $^1\text{H}$  NMR (400 MHz, DMSO- $d_6$ )  $\delta$  7.898-7.950 (m, 2H), 7.788-7.810 (m, 1H), 7.398-7.463 (m, 2H), 7.303-7.338 (m, 3H), 7.186-7.213 (m, 2H), 7.010 (s, 2H), 5.344 (s, 1H);  $^{13}\text{C}$  NMR (400 MHz, DMSO- $d_6$ )  $\delta$  37.34, 57.44, 115.11, 116.77, 120.26, 123.49, 124.96, 127.13, 128.80, 129.67, 130.01, 130.80, 131.14, 132.09, 144.63, 146.77, 159.68.

**3-Amino-2-cyano-1-(4-bromophenyl)-4H-benzo[f]-chromene**(Table 1, Entry 11),  $^1\text{H}$  NMR (400 MHz, DMSO- $d_6$ )  $\delta$  7.900-7.951 (m, 2H), 7.785-7.804 (m, 1H), 7.416-7.459 (m, 4H), 7.314-7.336 (d, 1H,  $J = 8.8$  Hz), 7.127-7.148 (d, 2H,  $J = 8.4$  Hz), 7.014 (s, 2H), 5.331 (s, 1H);  $^{13}\text{C}$  NMR (400 MHz, DMSO- $d_6$ )  $\delta$  37.40, 57.34, 115.04, 116.75, 119.63, 120.23, 123.50, 124.96, 127.14, 128.48, 129.18, 129.67, 130.01, 130.80, 131.57, 132.08, 132.64, 145.04, 146.77, 159.66.

**3-Amino-2-cyano-1-(3-bromophenyl)-4H-benzo[f]-chromene**(Table 1, Entry 12)  $^1\text{H}$  NMR (400 MHz, DMSO- $d_6$ )  $\delta$  7.915-7.965 (m, 2H), 7.824-7.844 (d, 1H,  $J = 8$  Hz), 7.427-7.471 (m, 2H), 7.351-7.379 (m, 3H), 7.203-7.222 (t, 1H), 7.165-7.185 (d, 1H,  $J = 8$  Hz), 7.051 (s, 2H), 5.367 (s, 1H);  $^{13}\text{C}$  NMR (400 MHz, DMSO- $d_6$ )  $\delta$  37.46, 57.33, 114.99, 116.78, 120.23, 121.92, 123.48, 125.05, 127.24, 128.52, 129.50, 129.56, 129.78, 130.04, 130.81, 130.99, 146.88, 148.39, 159.81.

**3-Amino-2-cyano-1-(2-bromophenyl)-4H-benzo[f]-chromene**(Table 1, Entry 13)<sup>1</sup>H NMR (500 MHz, DMSO-*d*<sub>6</sub>) δ 7.925-7.960 (m, 2H), 7.627-7.657 (t, 2H), 7.415-7.496 (m, 2H), 7.341-7.359 (d, 1H, *J* = 9 Hz), 7.192-7.221 (t, 1H), 7.087-7.118 (m, 1H), 7.031 (s, 2H), 6.918-6.933 (d, 1H), 5.691 (s, 1H); <sup>13</sup>C NMR (400 MHz, DMSO-*d*<sub>6</sub>) δ 37.38, 56.37, 115.00, 116.78, 119.58, 121.71, 122.79, 125.00, 127.38, 128.66, 128.70, 128.76, 129.88, 130.01, 130.09, 130.75, 132.69, 144.29, 147.05, 159.73.

**3-Amino-2-cyano-1-(4-methoxyphenyl)-4H-benzo[f]-chromene**(Table 1, Entry 14)<sup>1</sup>H NMR (400 MHz, DMSO-*d*<sub>6</sub>) δ 7.880-7.918 (m, 2H), 7.824-7.844 (d, 1H, *J* = 8 Hz), 7.395-7.432 (m, 2H), 7.303-7.325 (d, 1H, *J* = 8.8 Hz), 7.077-7.099 (d, 2H, *J* = 8.8 Hz), 6.909 (s, 2H), 6.789-6.810 (d, 2H, *J* = 8.4 Hz), 5.229 (s, 1H), 3.654 (s, 3H); <sup>13</sup>C NMR (400 MHz, DMSO-*d*<sub>6</sub>) δ 37.29, 54.95, 58.25, 114.02, 115.92, 116.74, 120.49, 123.64, 124.83, 126.96, 128.00, 128.40, 129.31, 130.15, 130.80, 137.86, 146.67, 157.82, 159.53.

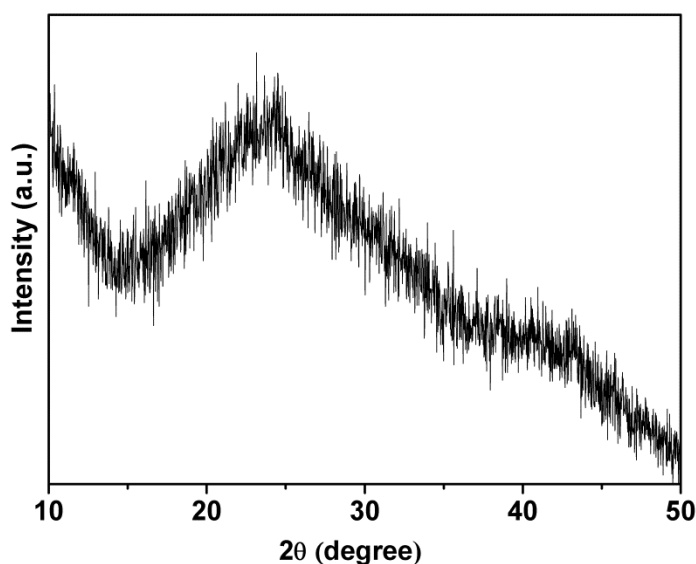

**Fig. S1.** Wide angle PXRD pattern of reused catalyst (after four consecutive cycles)

# <sup>1</sup>H NMR of 2-amino-3-cyano-7-hydroxy-4-phenyl-4H-chromene

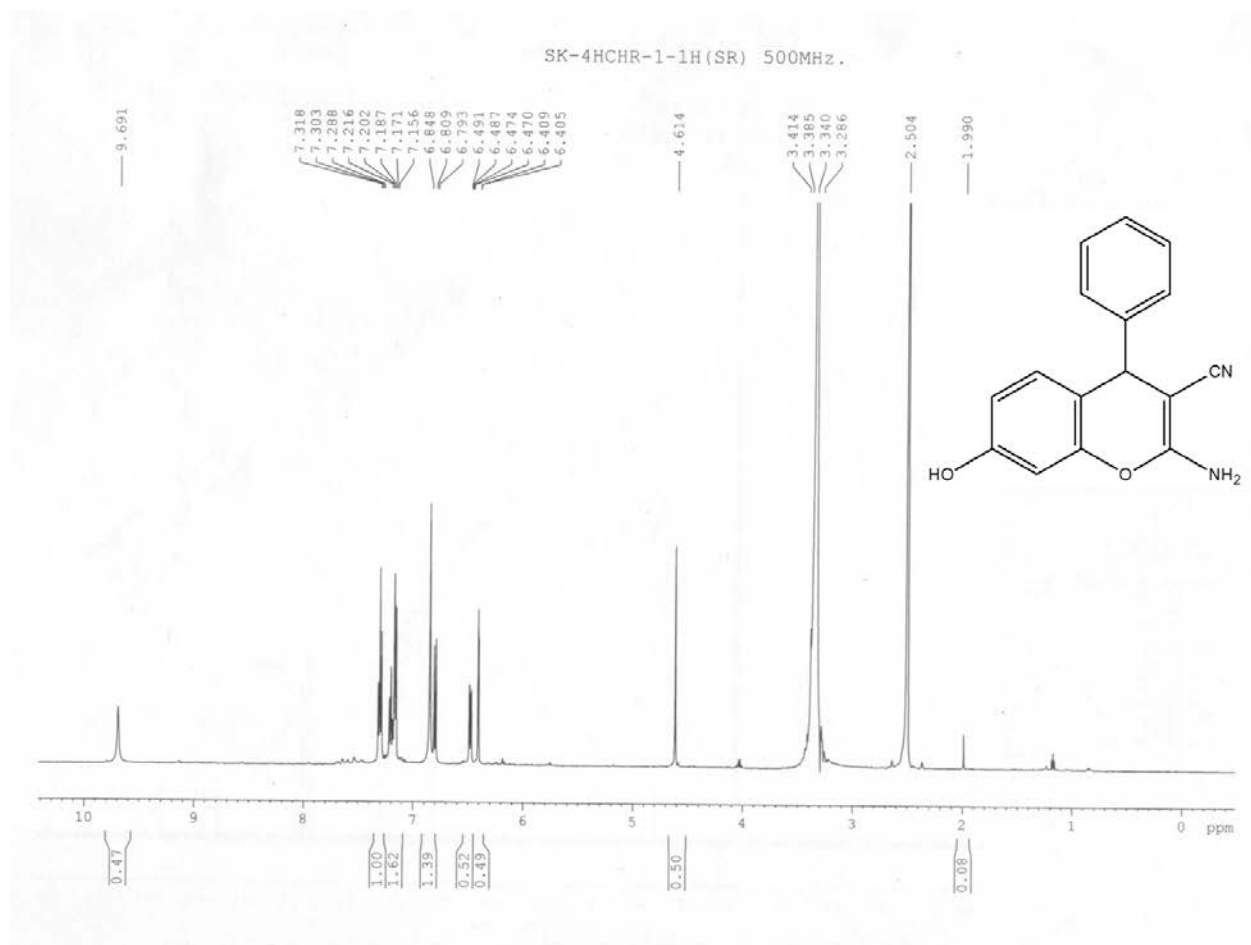

# <sup>13</sup>C NMR of 2-amino-3-cyano-7-hydroxy-4-phenyl-4H-chromene

SK-4HCHR-1-13C(S)

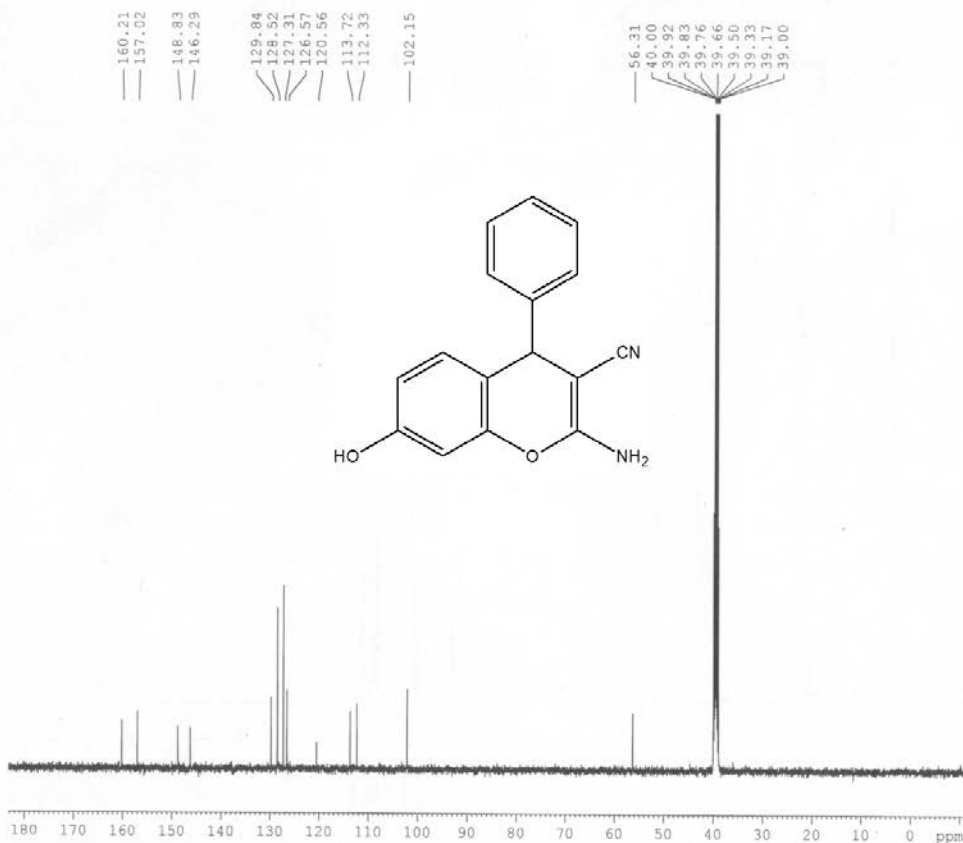

```

NAME SK-4HCHR-1-13C
EXPNO 1
PROCNO 1
Date_ 20140603
Time 17.59
INSTRUM spect
PROBHD 5 mm PABBO BB-
PULPROG zgpg30
TD 32768
SOLVENT DMSO
NS 1024
DS 4
SWH 29761.904 Hz
FIDRES 0.908261 Hz
AQ 0.5505524 sec
RG 32
DW 16.800 usec
DE 6.50 usec
TE 299.6 K
D1 2.0000000 sec
D11 0.0300000 sec
TD0 1
    
```

```

===== CHANNEL f1 =====
NUC1 13C
PI 9.89 usec
PL1 0.50 dB
PL1W 82.16106415 W
SFO1 125.7703643 MHz
    
```

```

===== CHANNEL f2 =====
CPDPRG2 waltz16
NDC2 1W
PCPD2 80.00 usec
PL2 1.00 dB
PL12 15.34 dB
PL13 20.00 dB
PL2W 15.50318813 W
PL12W 0.57071728 W
PL13W 0.19517358 W
SFO2 500.1320005 MHz
SI 16384
SF 125.7578536 MHz
WDW EM
SSB 0
LB 1.00 Hz
GR 0
PC 1.00
    
```

# <sup>1</sup>H NMR of 2-amino-3-cyano-7-(4-methylphenyl)-4H-chromene

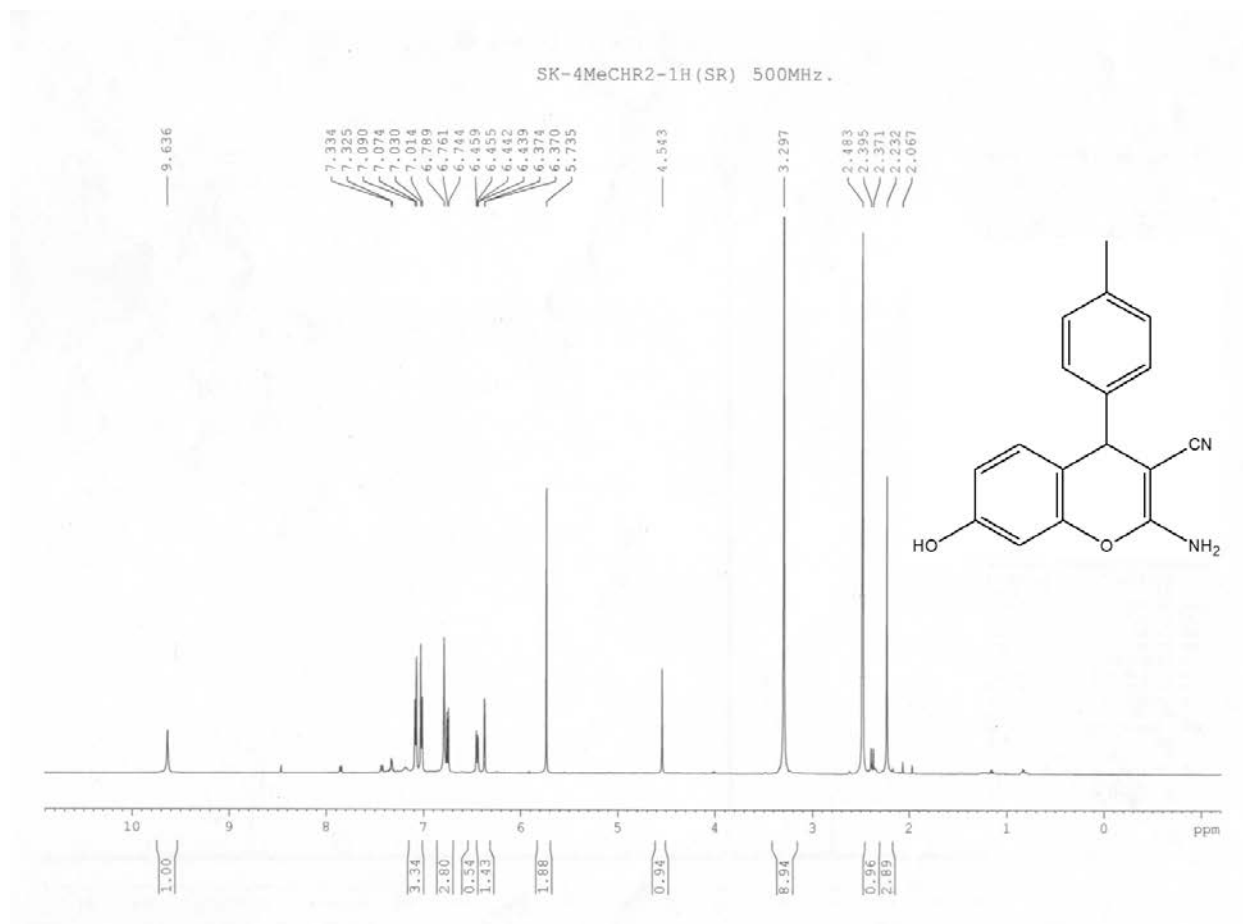

**<sup>13</sup>C NMR of 2-amino-3-cyano-7-hydroxy-4-(4-methylphenyl)-4H-chromene**

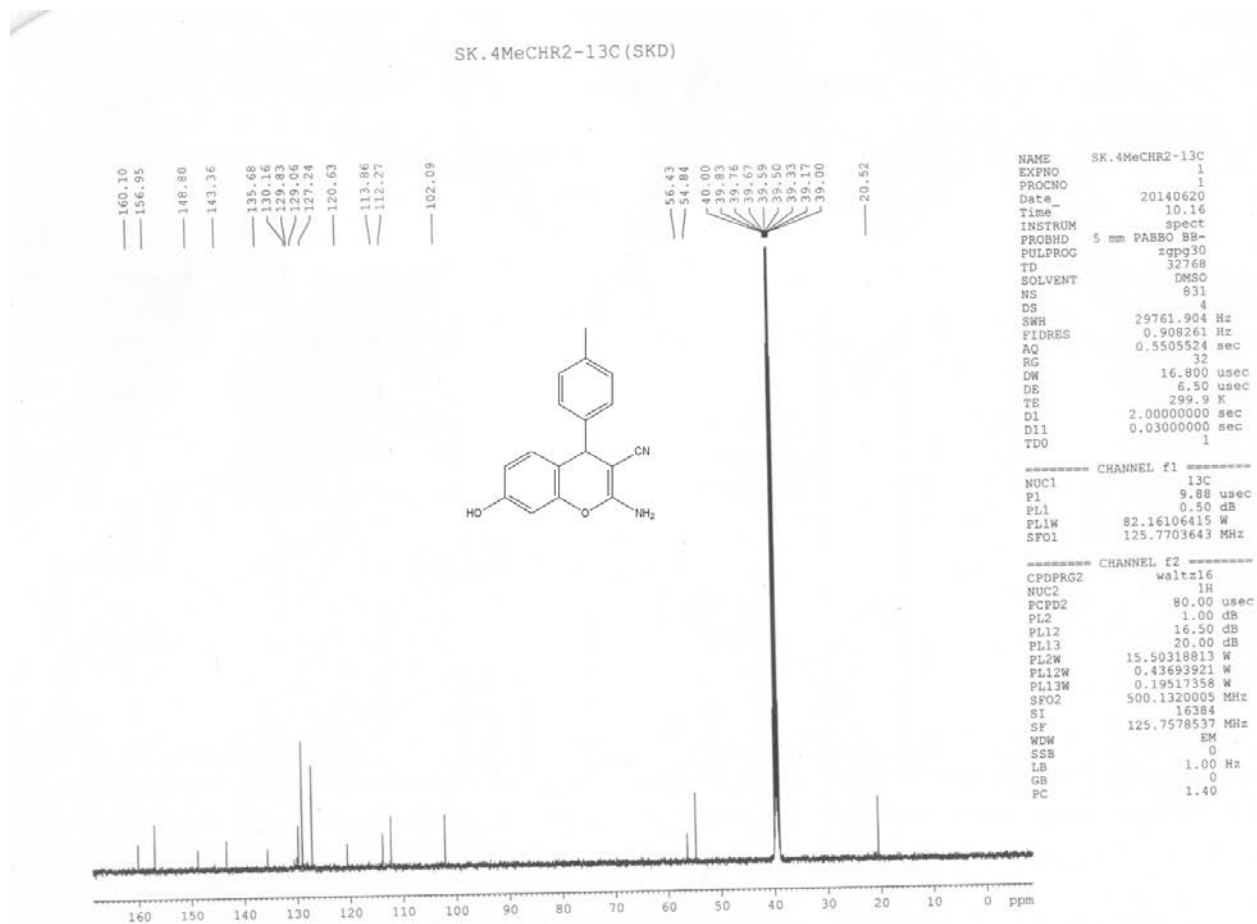



# <sup>1</sup>H NMR of 2-amino-3-cyano-7-hydroxy-4-(4-fluorophenyl)-4H-chromene

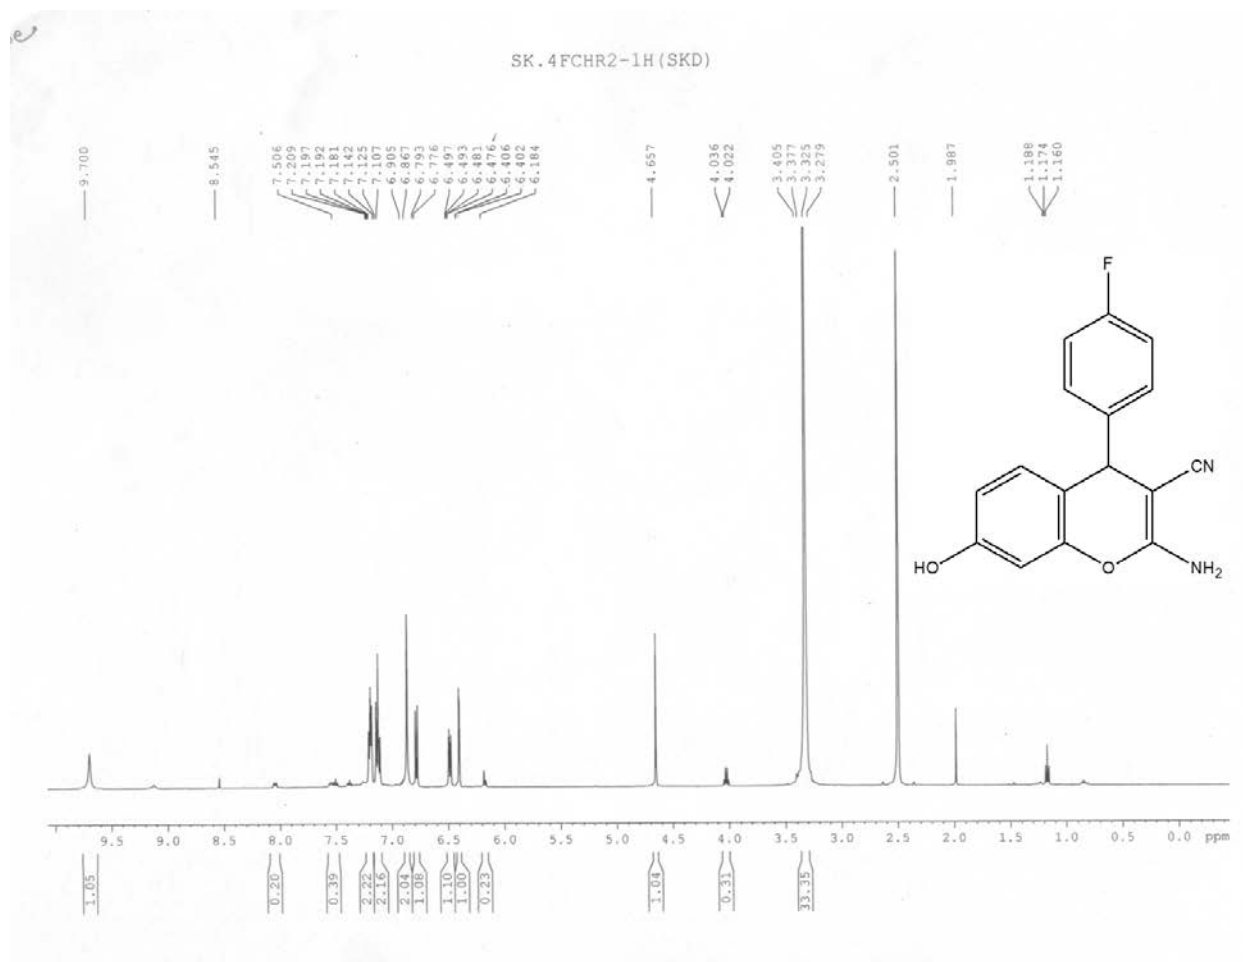

**<sup>13</sup>C NMR of 2-amino-3-cyano-7-hydroxy-4-(4-fluorophenyl)-4H-chromene**

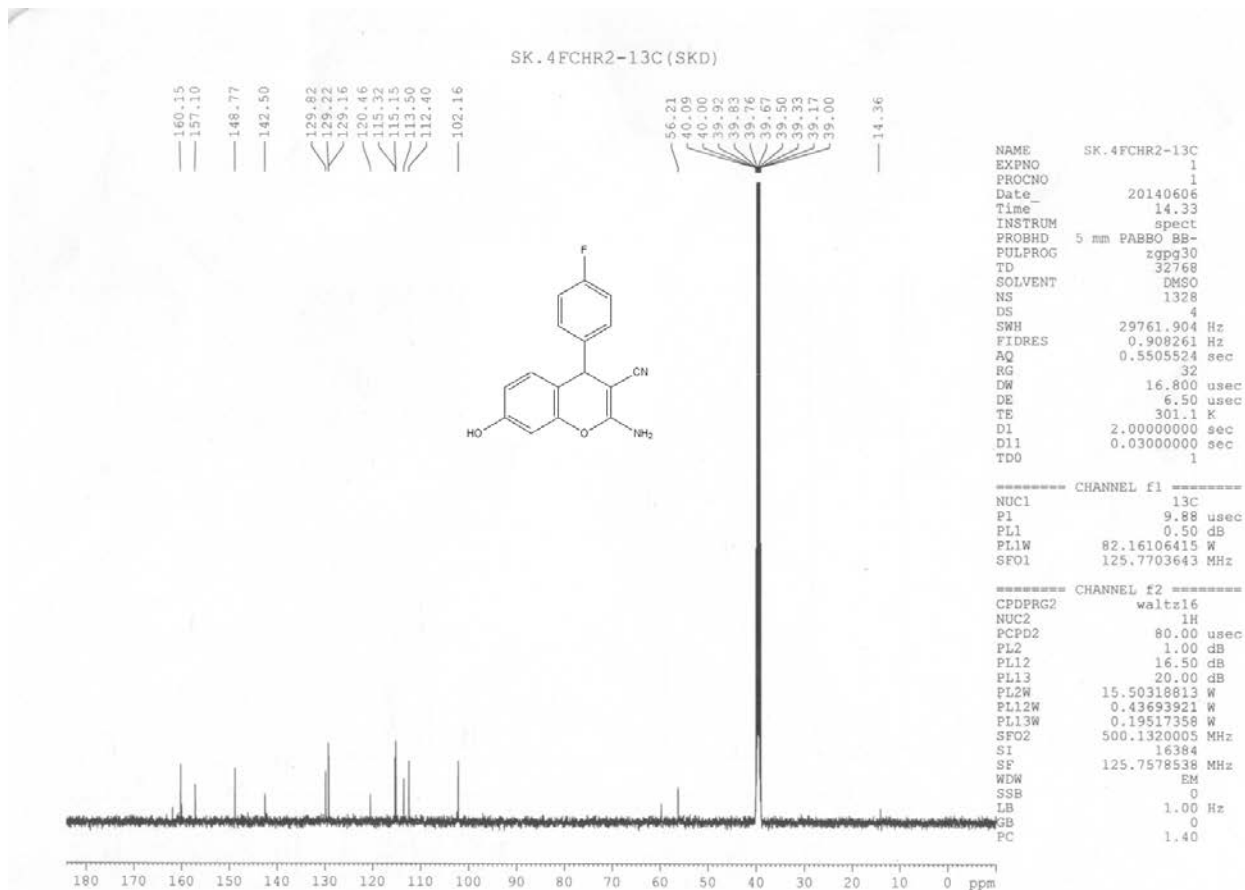

# <sup>1</sup>H NMR of 2-amino-3-cyano-7-hydroxy-4-(4-chlorophenyl)-4H-chromene

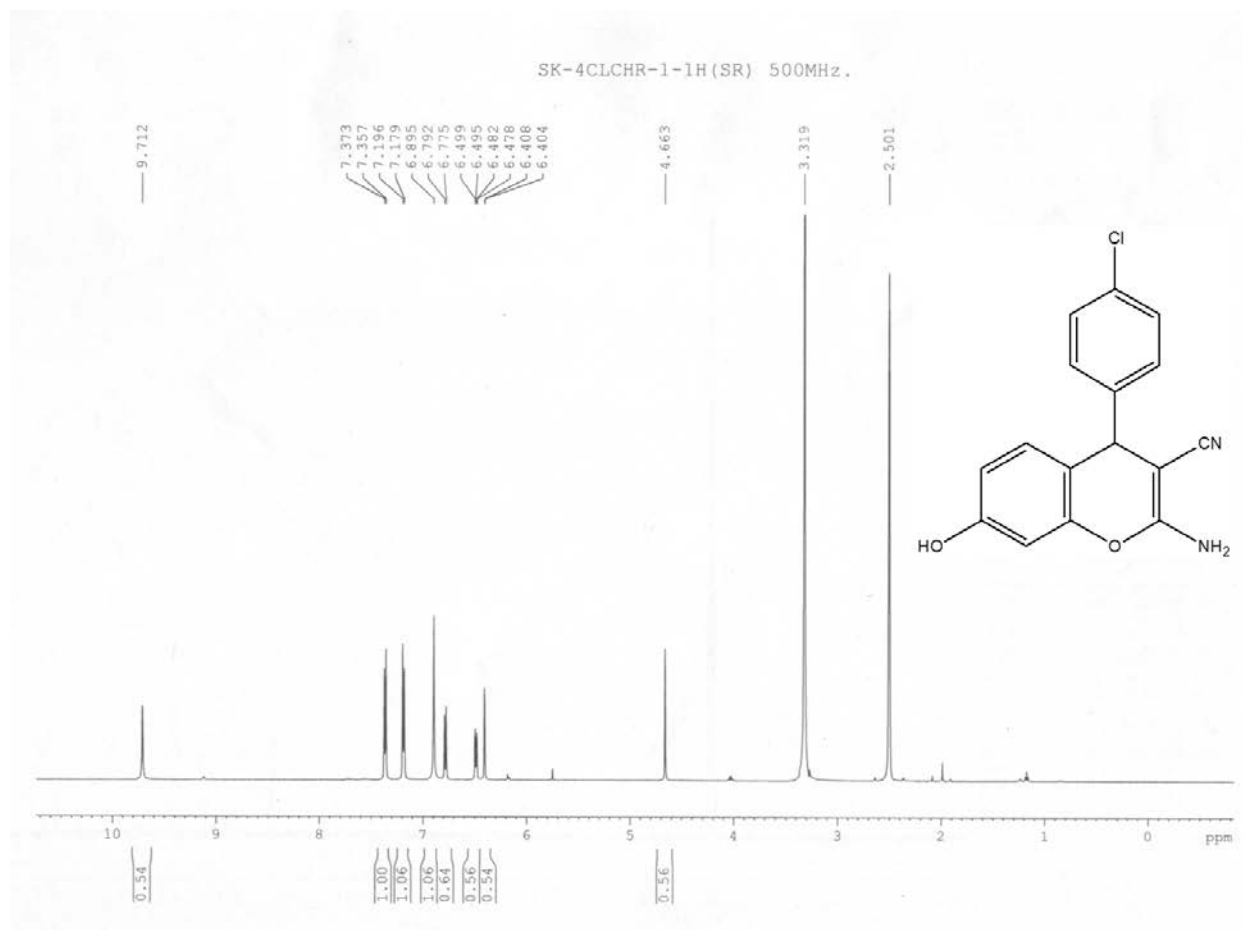

# <sup>13</sup>C NMR of 2-amino-3-cyano-7-hydroxy-4-(4-chlorophenyl)-4H-chromene

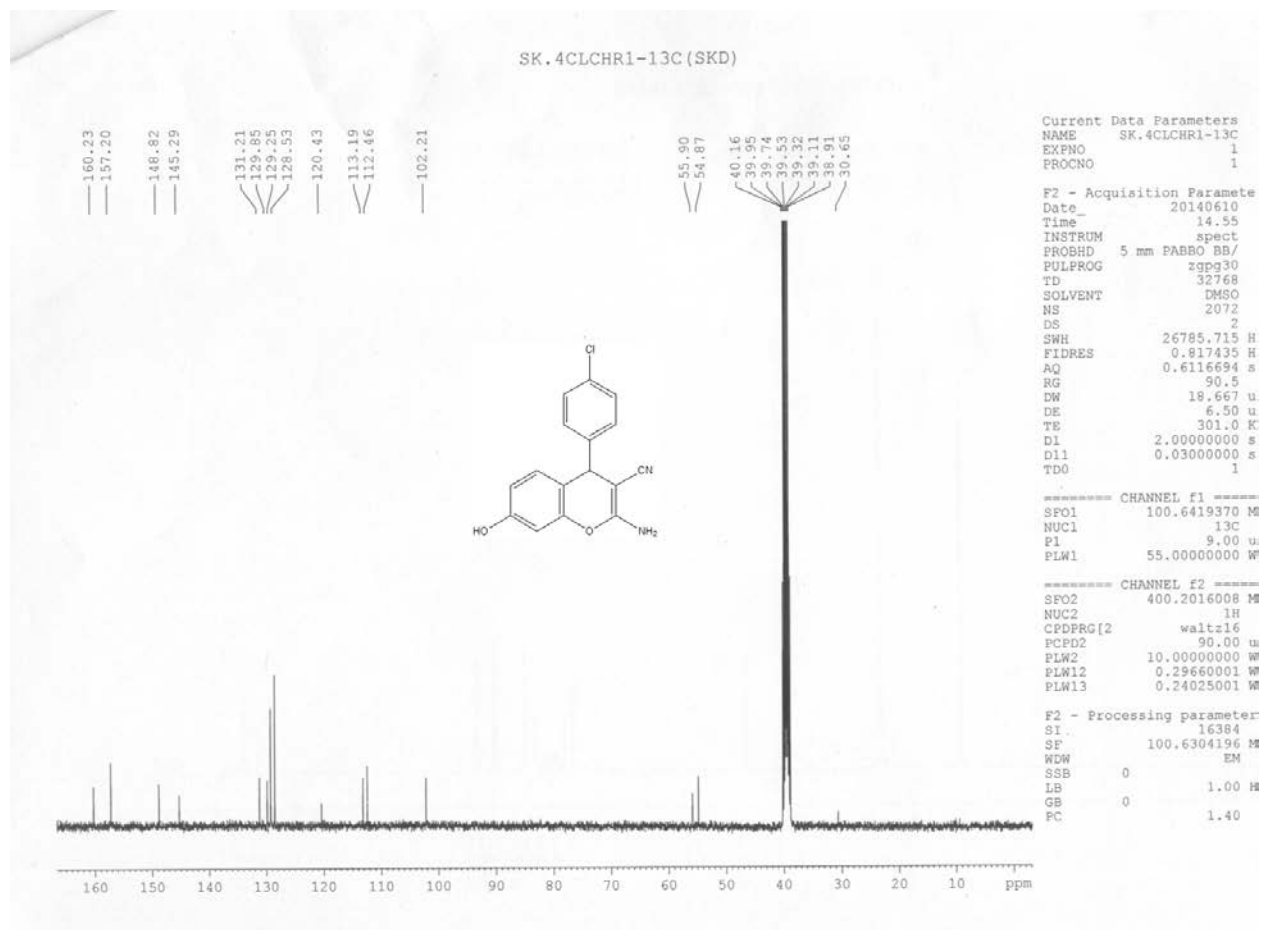

**$^1\text{H}$  NMR of 2-amino-3-cyano-7-hydroxy-4-(4-bromophenyl)-4H-chromene**

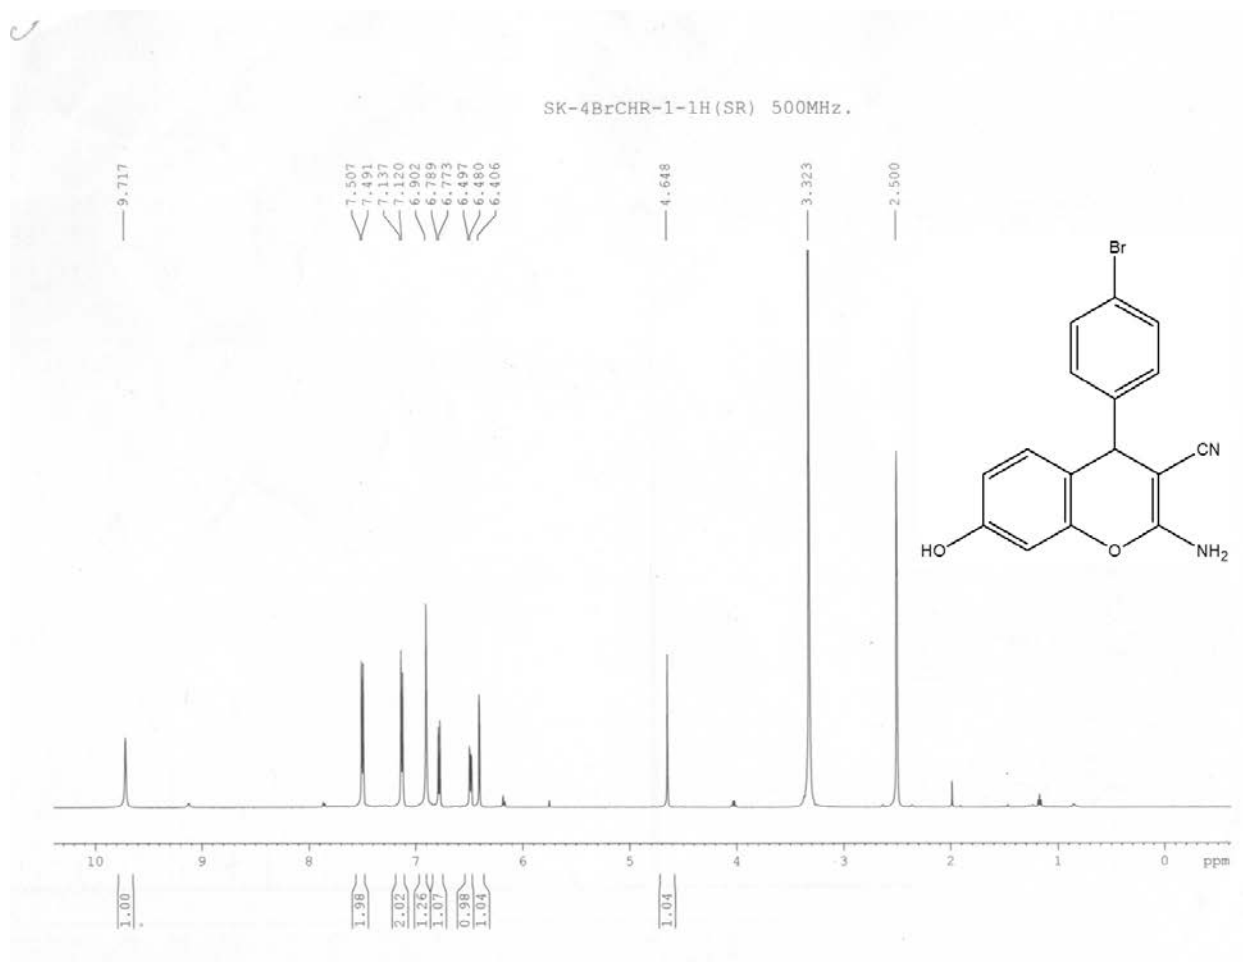

<sup>13</sup>C NMR of 2-amino-3-cyano-7-hydroxy-4-(4-bromophenyl)-4H-chromene

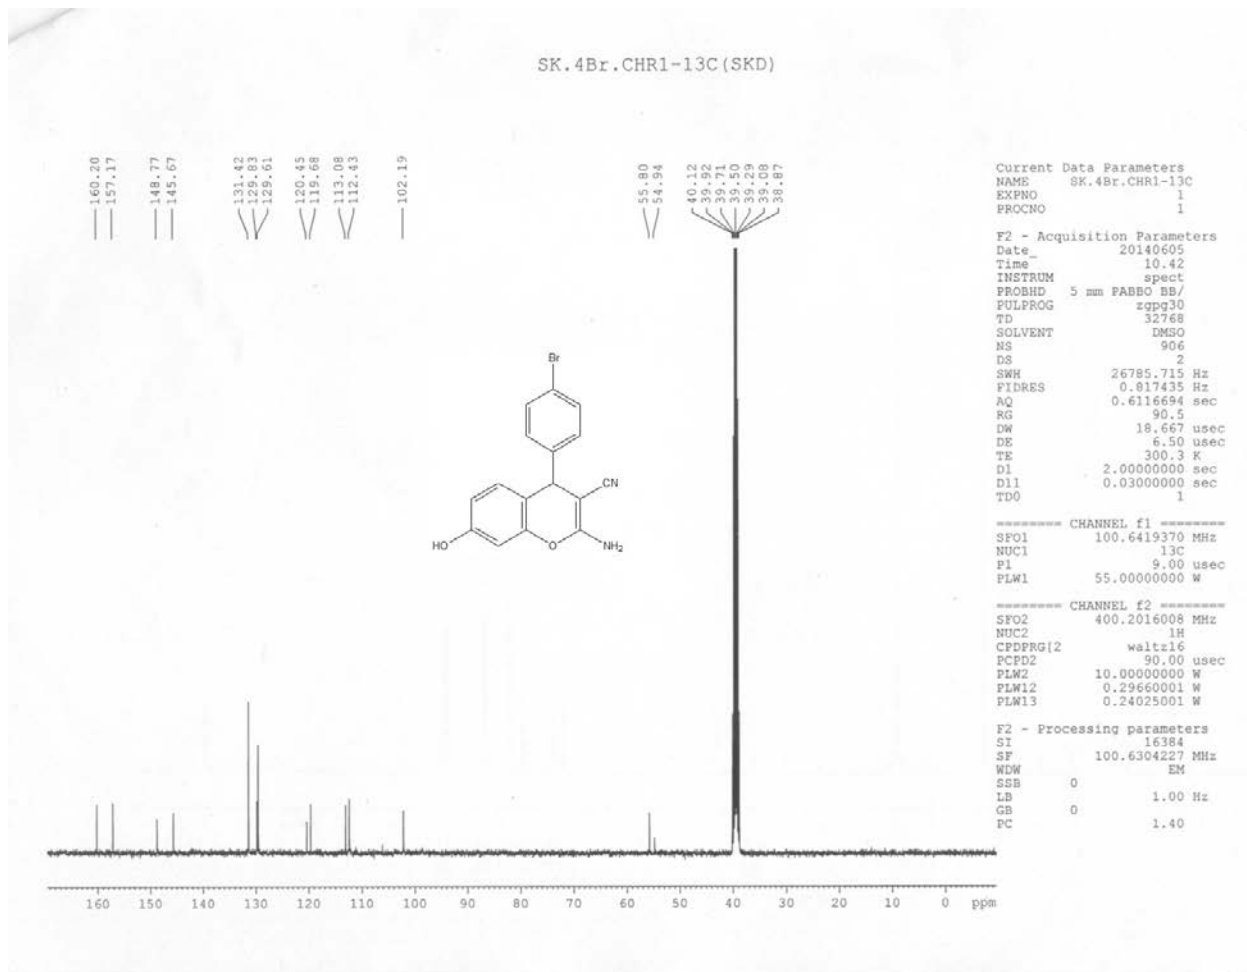

# <sup>1</sup>H NMR of 2-amino-7-hydroxy-4-(thiophen-2-yl)-4H-chromene-3-carbonitrile

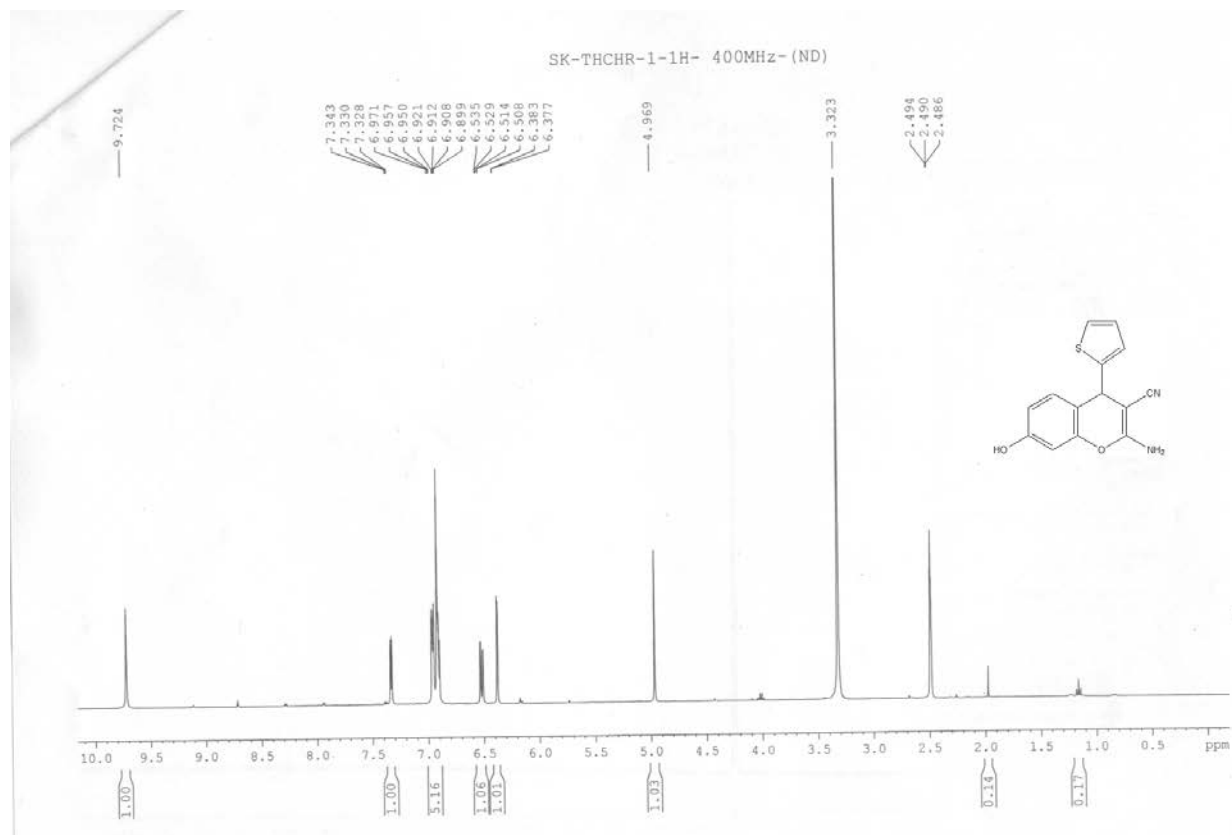

**<sup>13</sup>C NMR of 2-amino-7-hydroxy-4-(thiophen-2-yl)-4H-chromene-3-carbonitrile**

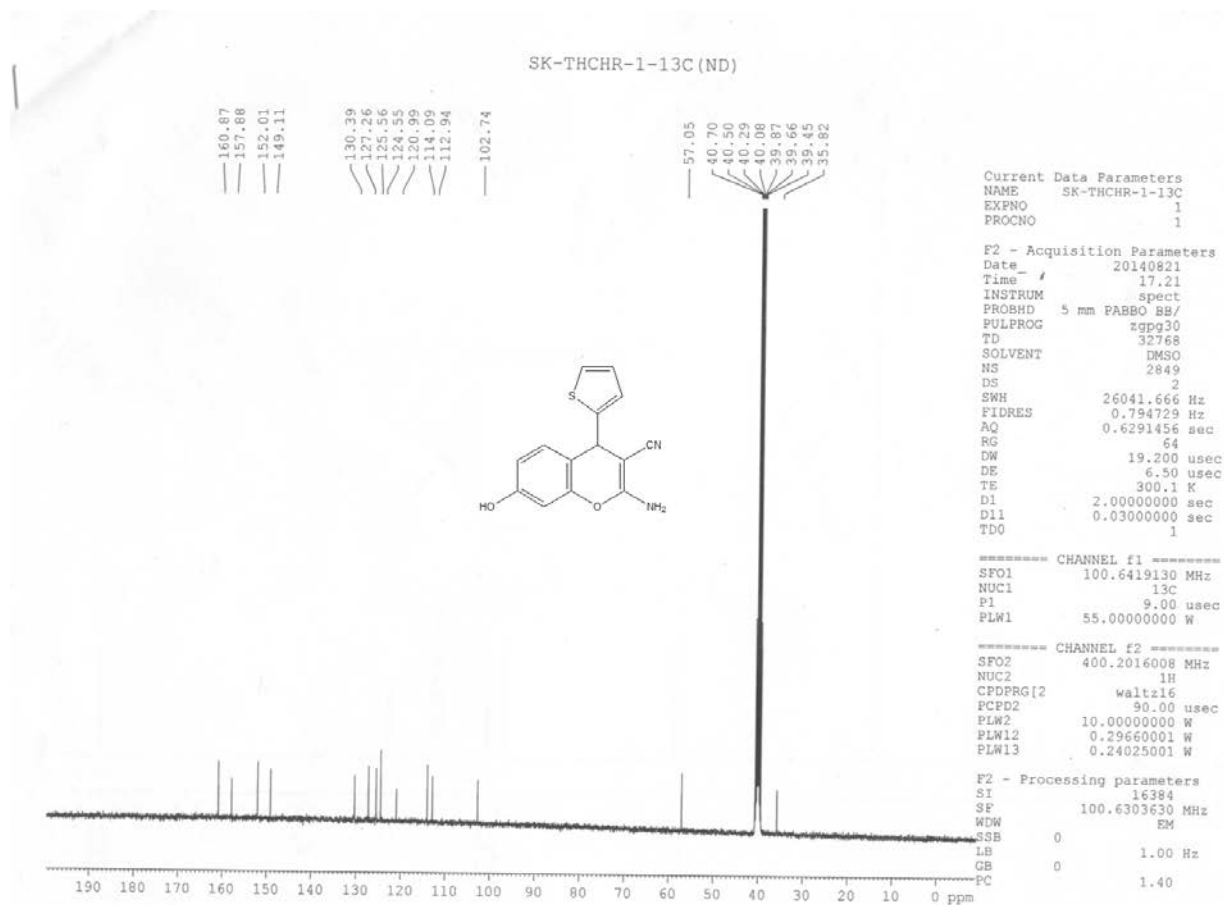



# <sup>1</sup>H NMR of 3-Amino-2-cyano-1-phenyl-4H-benzo[f]-chromene

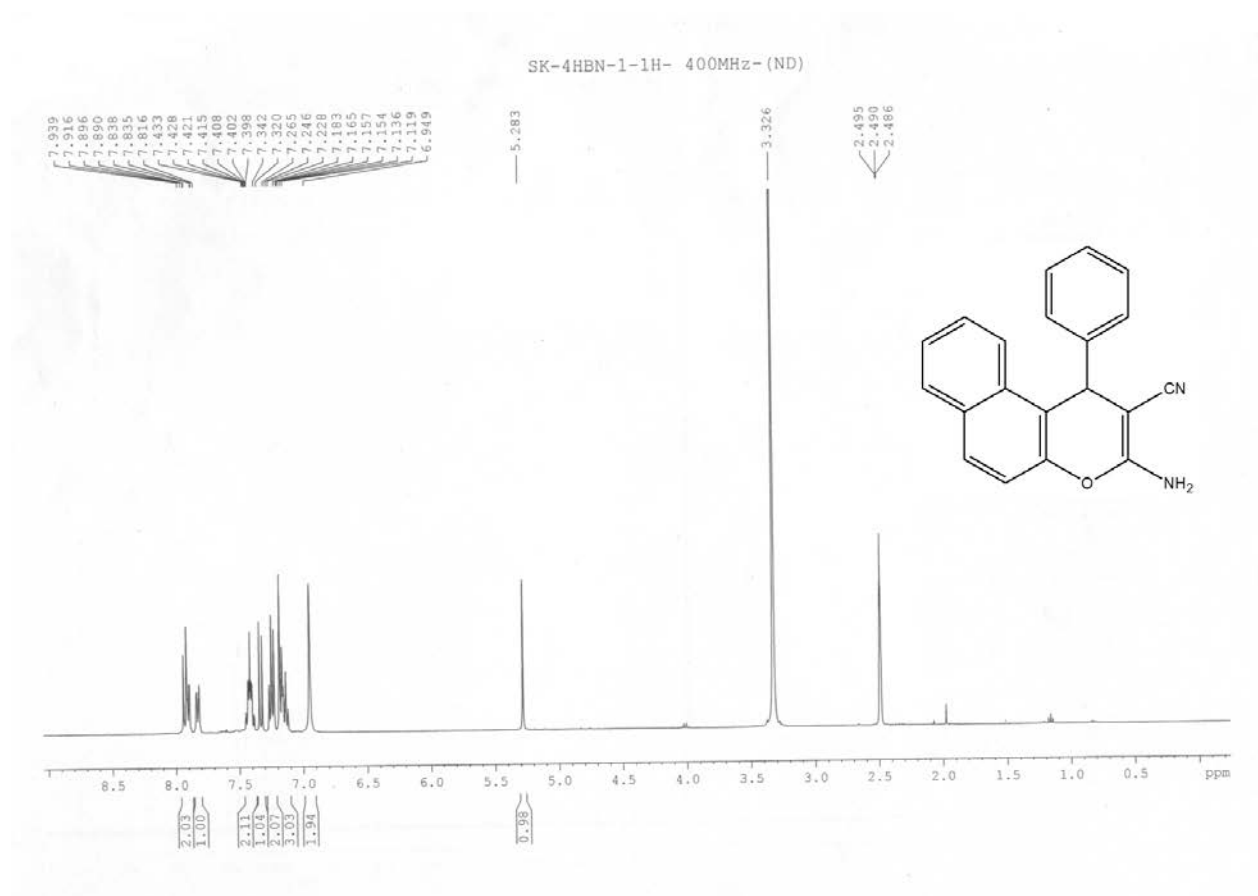

**<sup>13</sup>C NMR of 3-Amino-2-cyano-1-phenyl-4H-benzo[f]-chromene**

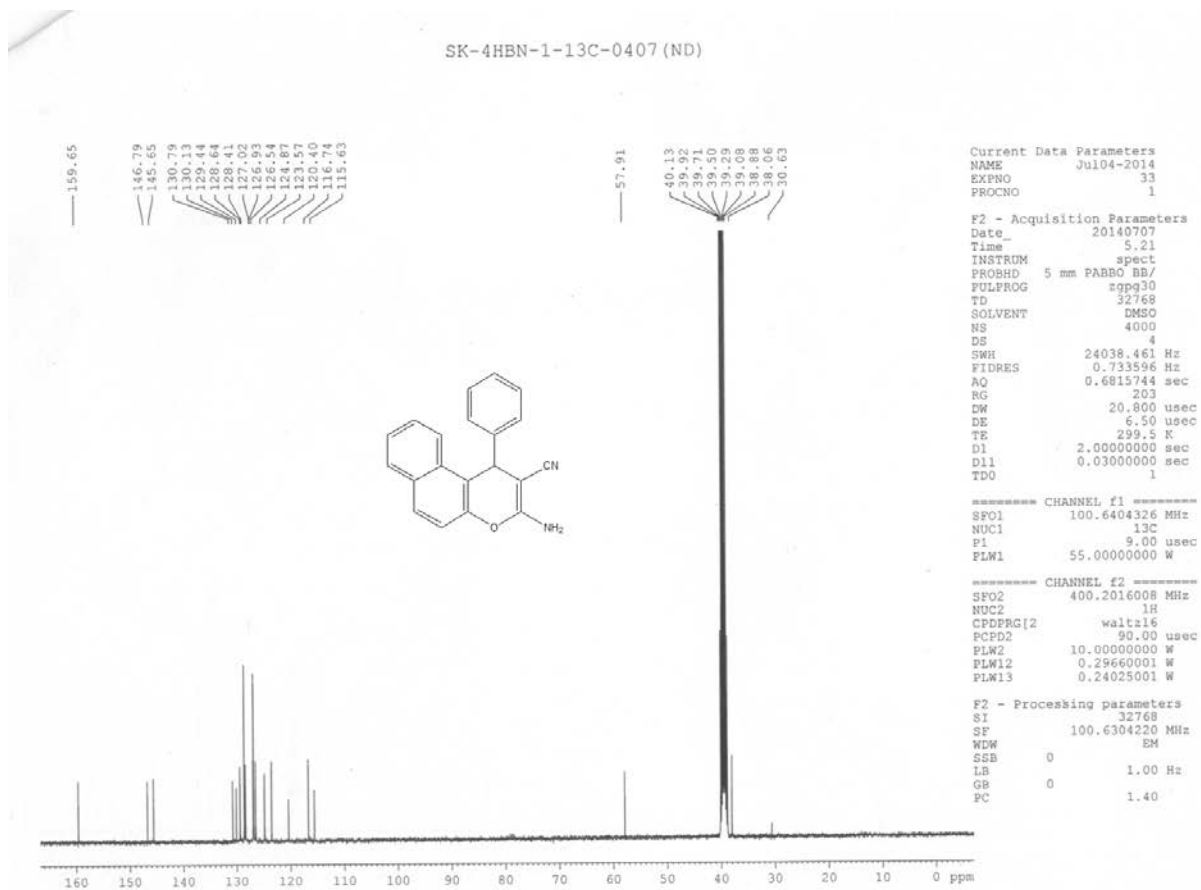

# <sup>1</sup>H NMR of 3-Amino-2-cyano-1-(4-chlorophenyl)-4H-benzo[f]-chromene

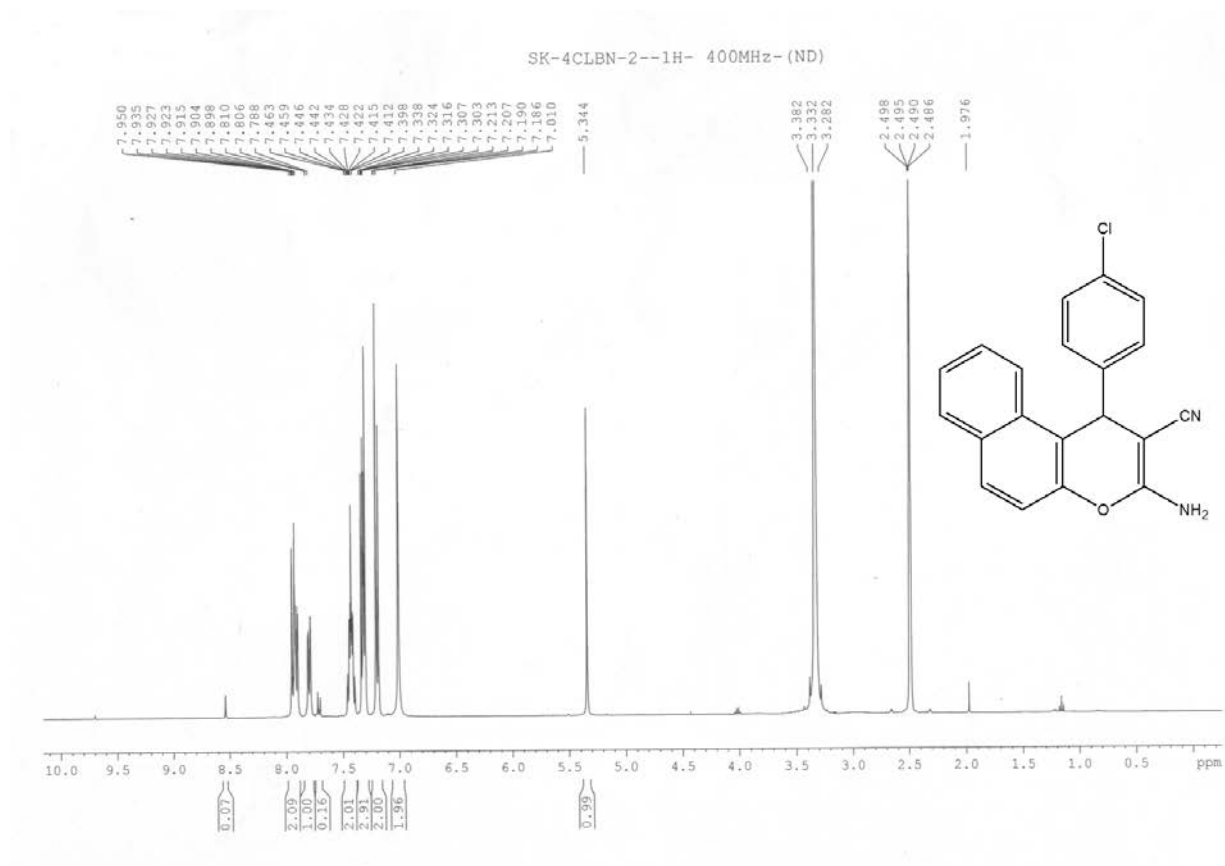

**<sup>13</sup>C NMR of 3-Amino-2-cyano-1-(4-chlorophenyl)-4H-benzo[f]-chromene**

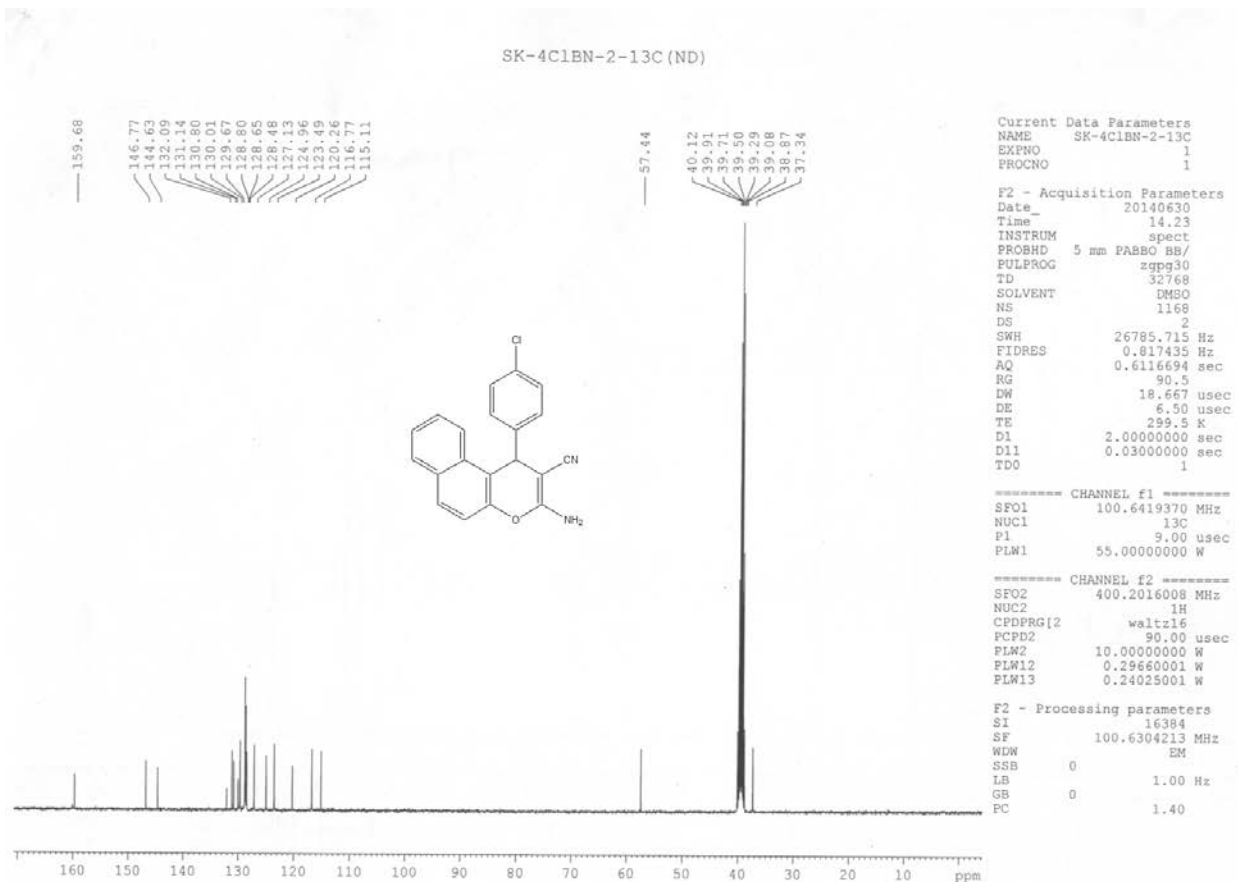

# <sup>1</sup>H NMR of 3-Amino-2-cyano-1-(4-bromophenyl)-4H-benzo[f]-chromene

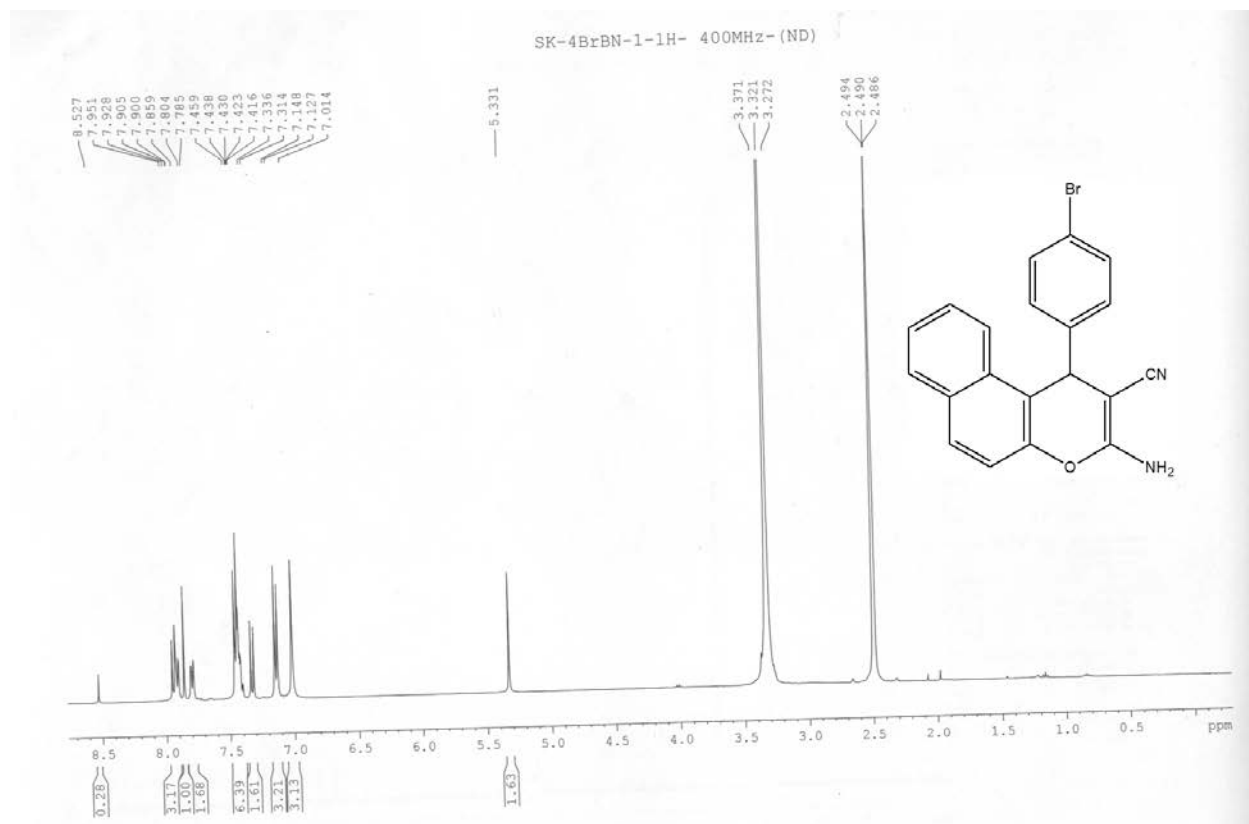

**<sup>13</sup>C NMR of 3-Amino-2-cyano-1-(4-bromophenyl)-4H-benzo[f]-chromene**

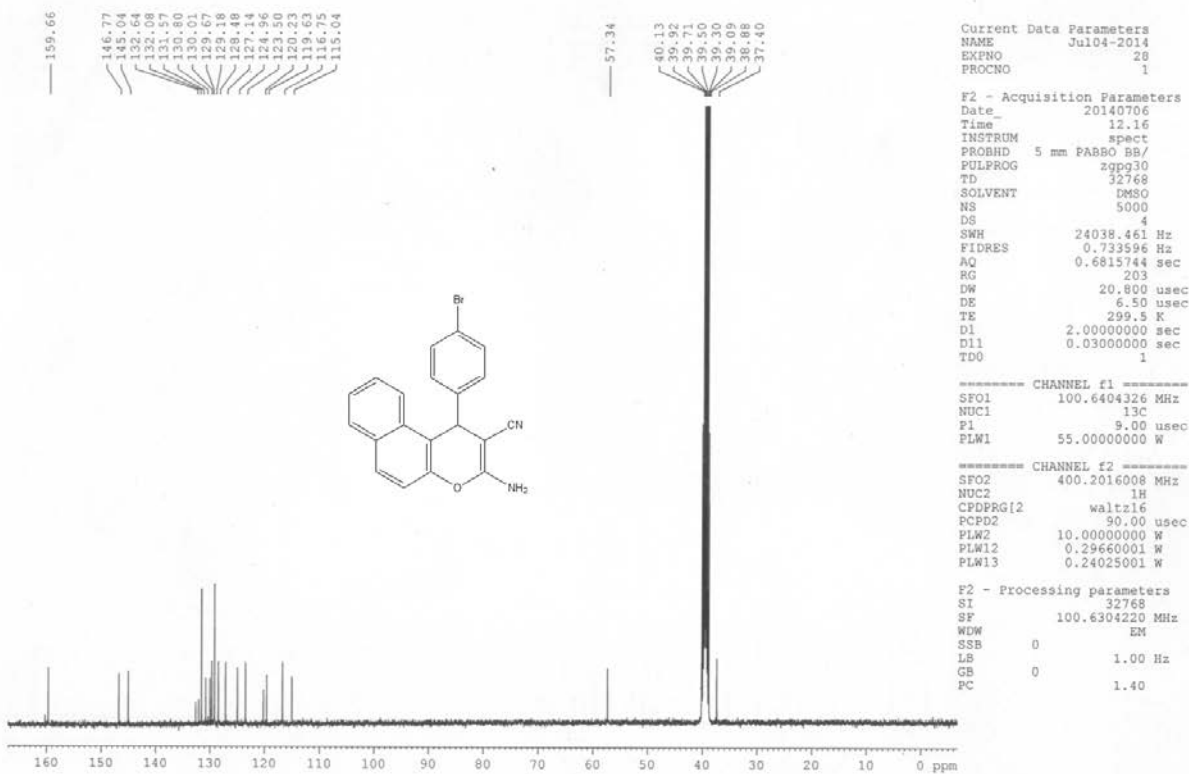

# <sup>1</sup>H NMR of 3-Amino-2-cyano-1-(3-bromophenyl)-4H-benzo[f]-chromene

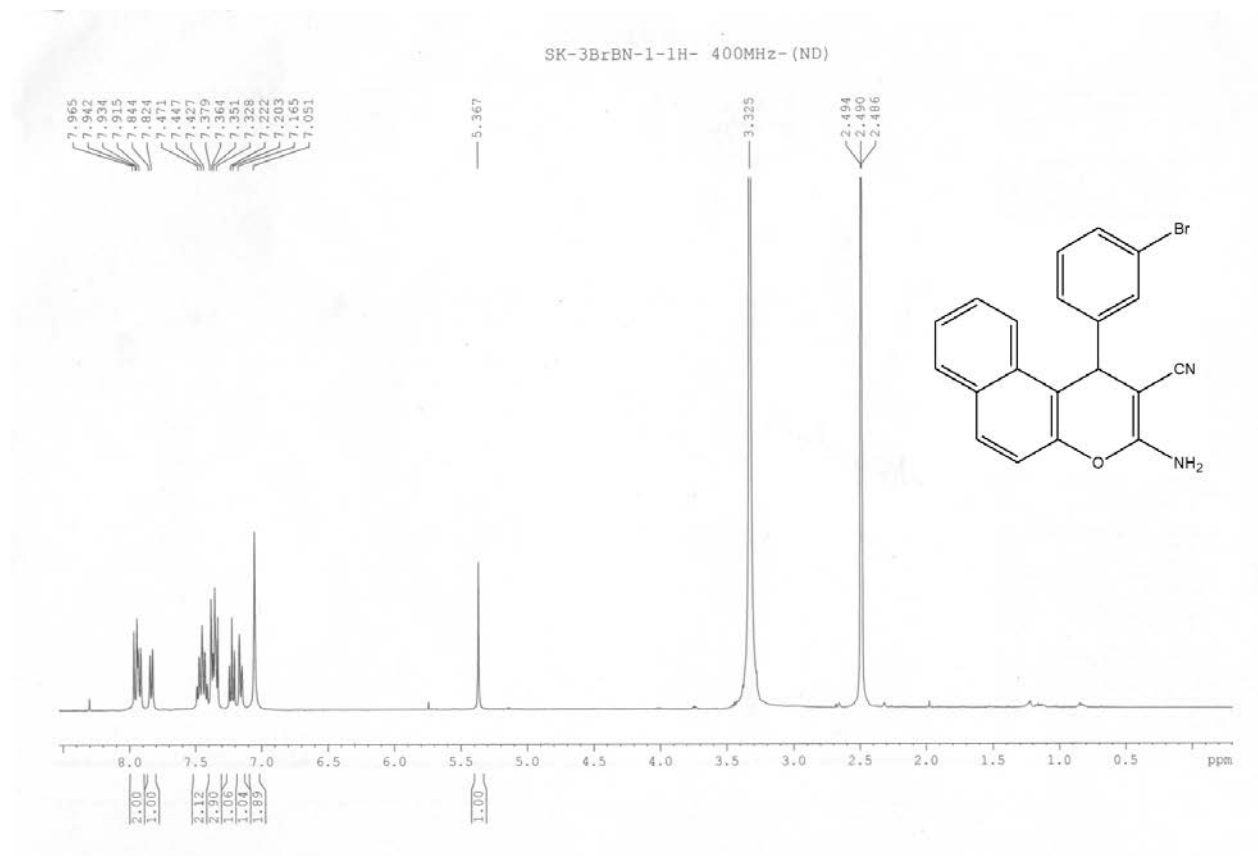

**<sup>13</sup>C NMR of 3-Amino-2-cyano-1-(3-bromophenyl)-4H-benzo[f]-chromene**

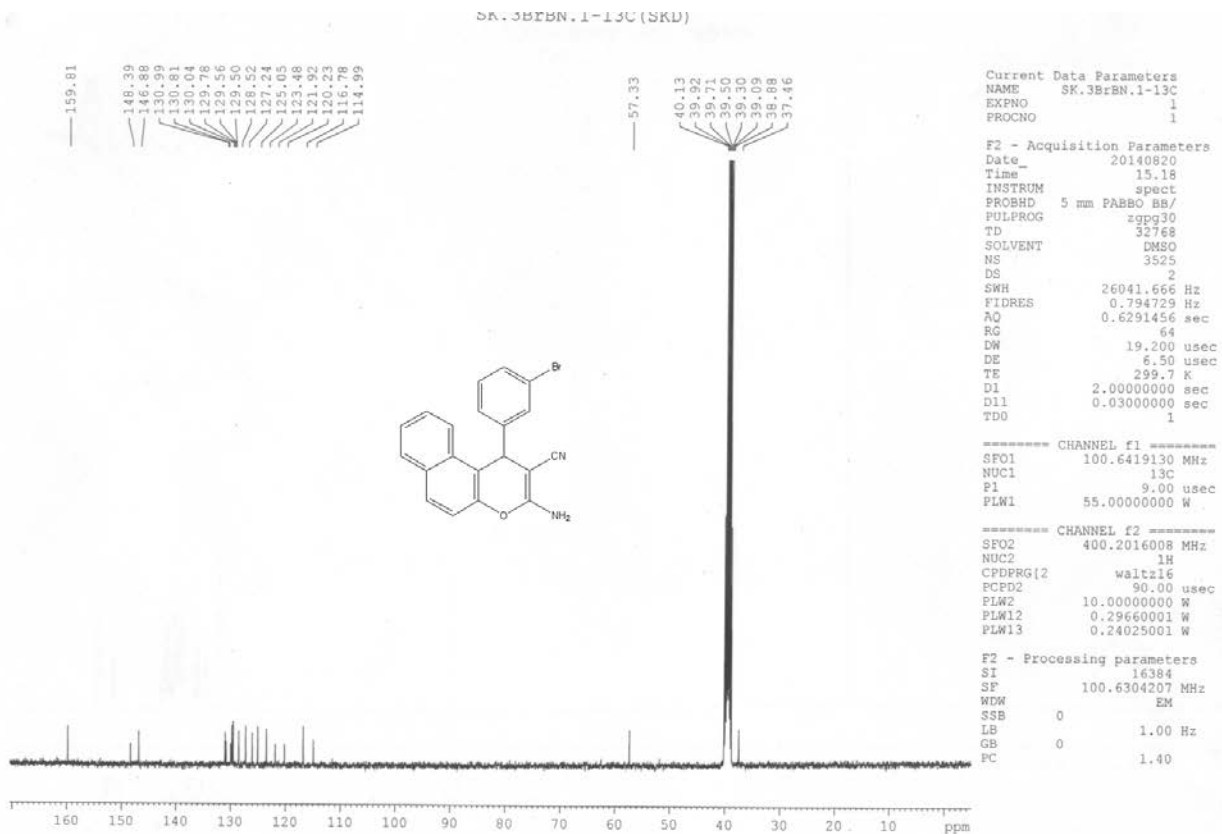



# <sup>1</sup>H NMR of 3-Amino-2-cyano-1-(2-bromophenyl)-4H-benzo[f]-chromene

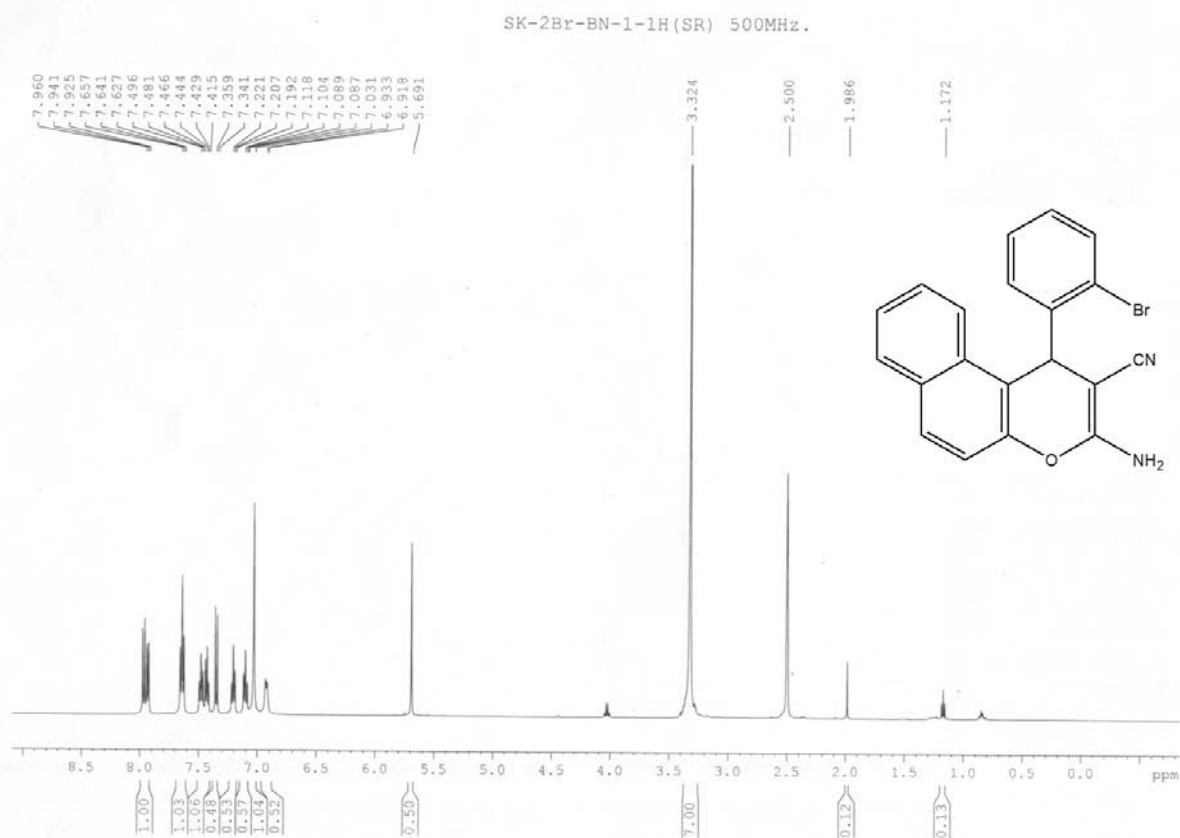

**<sup>13</sup>C NMR of 3-Amino-2-cyano-1-(2-bromophenyl)-4H-benzo[f]-chromene**

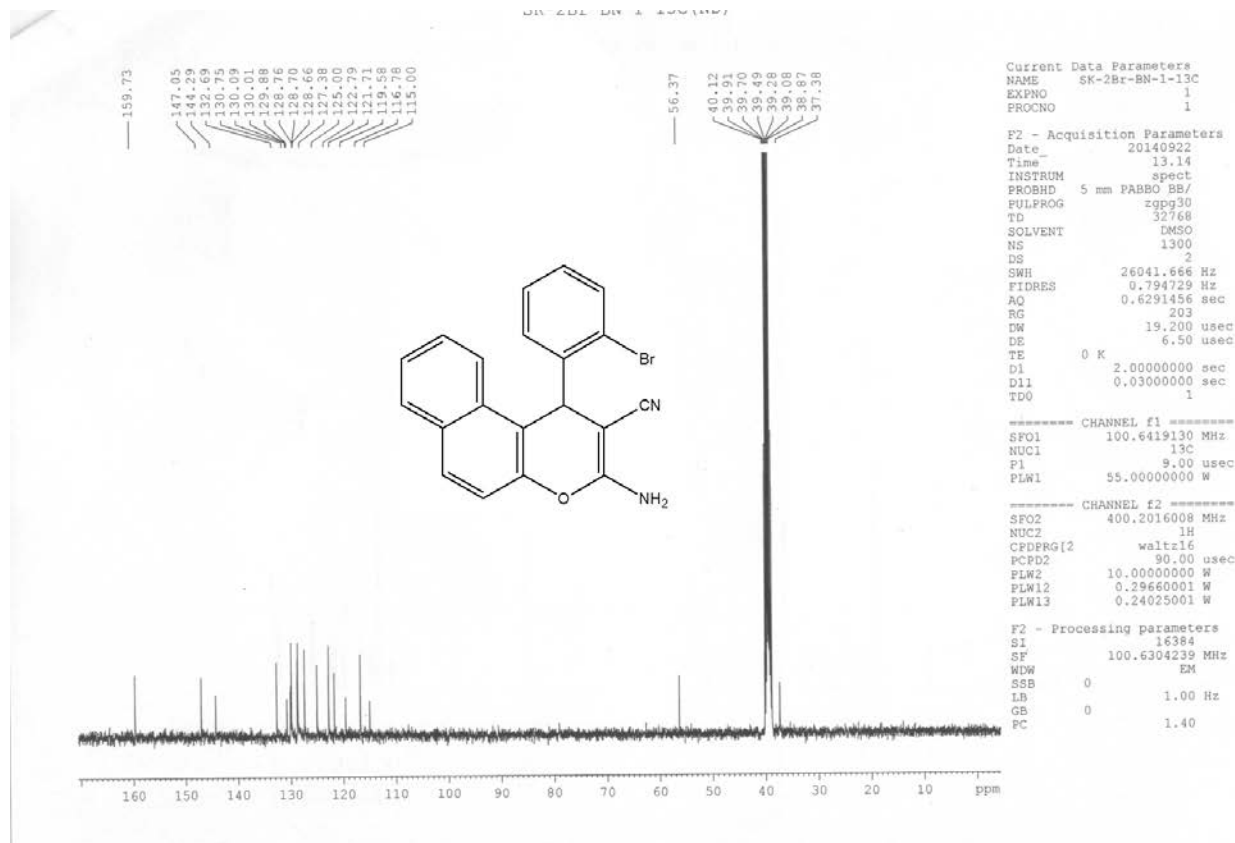

# <sup>1</sup>H NMR of 3-Amino-2-cyano-1-(4-methoxyphenyl)-4H-benzo[f]-chromene

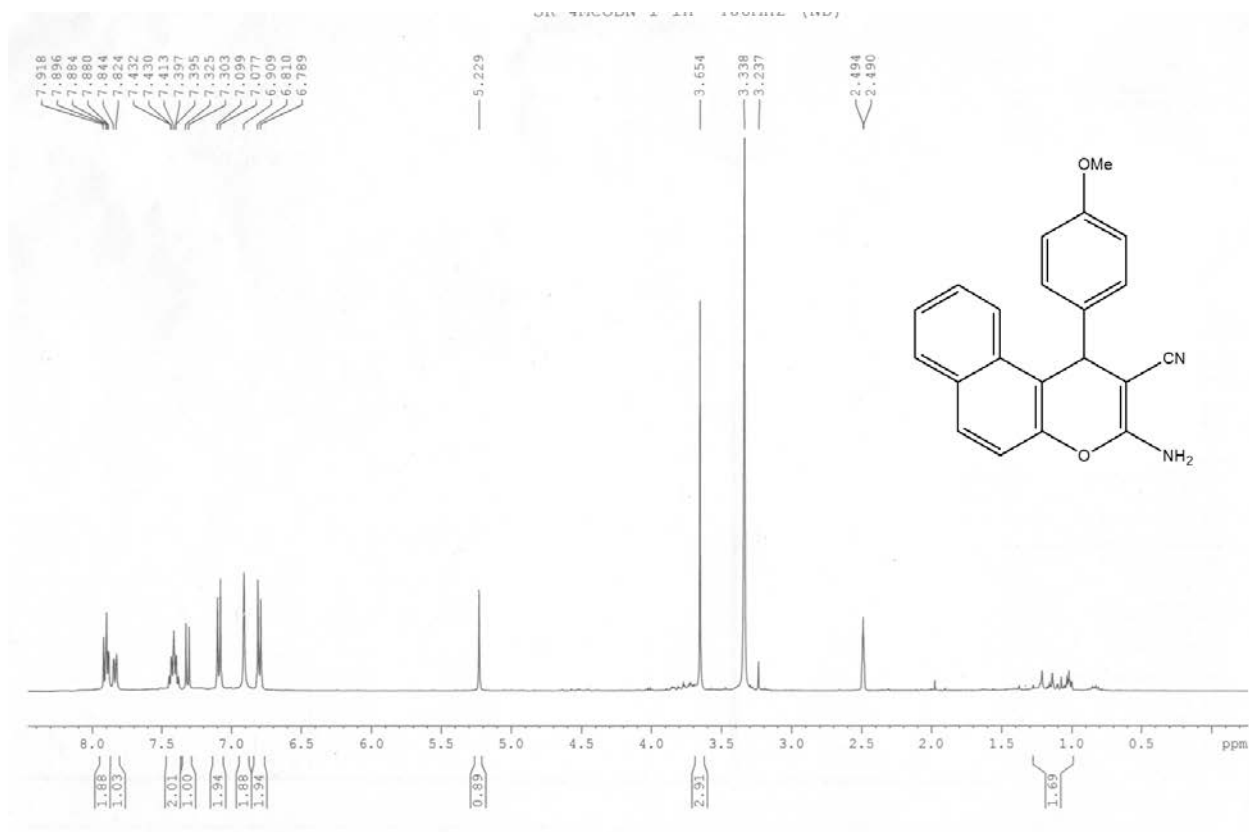

**<sup>13</sup>C NMR of 3-Amino-2-cyano-1-(4-methoxyphenyl)-4H-benzo[f]-chromene**

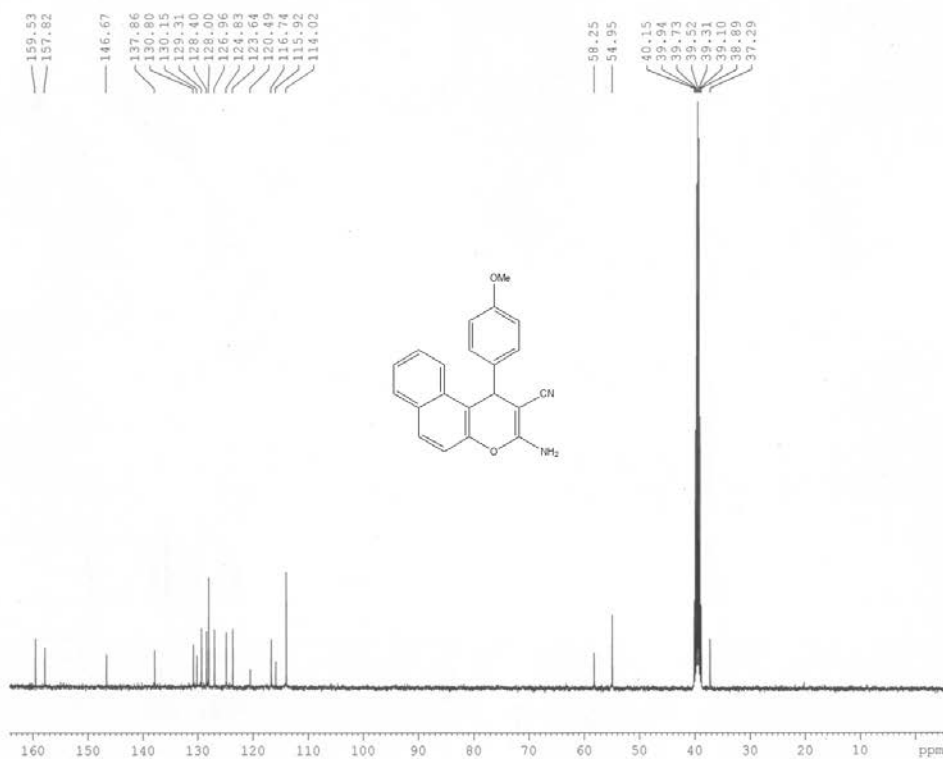

```

Current Data Parameters
NAME      SK-4MeOBN-1-13C
EXPNO     1
PROCNO    1

F2 - Acquisition Parameters
Date_     20140911
Time      12.16
INSTRUM   spect
PROBHD    5 mm PABBO BB/
PULPROG   zgpg30
TD         32768
SOLVENT   DMSO
NS         521
DS         2
SWH        26041.666 Hz
FIDRES     0.794729 Hz
AQ         0.6291456 sec
RG         64
DW         19.200 usec
DE         6.50 usec
TE         0 K
D1         2.00000000 sec
D11        0.03000000 sec
TD0        1

===== CHANNEL f1 =====
SFO1      100.6419130 MHz
NUC1       13C
P1         9.00 usec
PLW1       55.00000000 W

===== CHANNEL f2 =====
SFO2      400.2016008 MHz
NUC2       1H
CFDPRG[2] waltr16
PCPD2     90.00 usec
PLW2      10.00000000 W
PLW12     0.29660001 W
PLW13     0.24025001 W

F2 - Processing parameters
SI         16384
SF         100.6304206 MHz
WDW        EM
SSB        0
LB         1.00 Hz
GB         0
FC         1.40
    
```
